# Supplementary material for: In Vitro Biodegradation of a-C:H:SiOx Films on Ti-6Al-4V Alloy
Source: MDPI journal article supplement (doi:10.3390/ma15124239), 2022-06-15
Supplement: s1 [file s1]

## Supplementary Materials

A

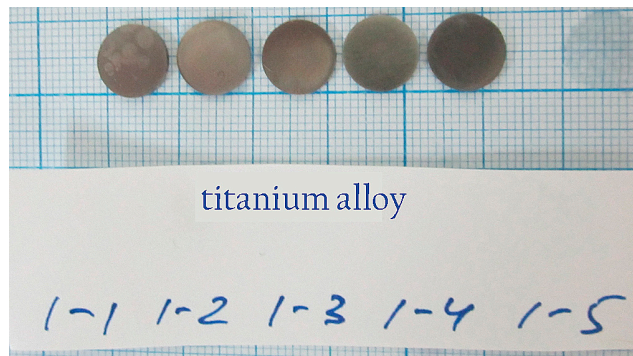

B

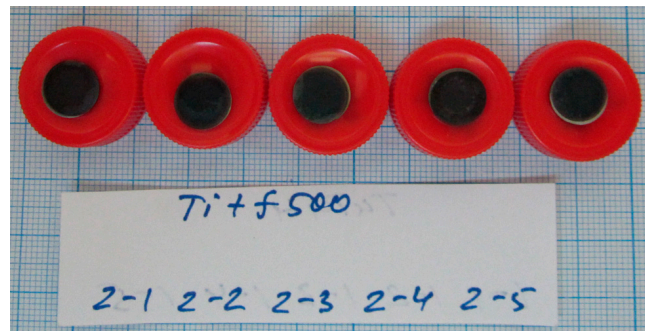

C

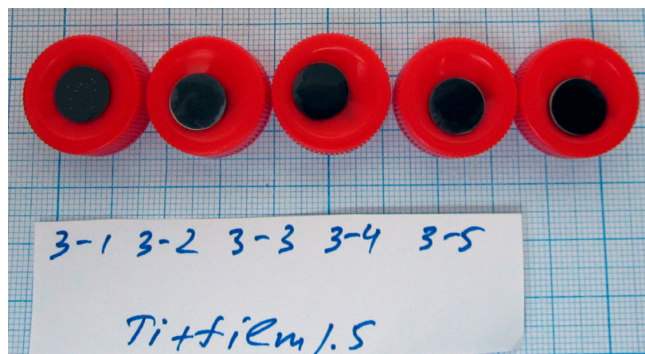

D

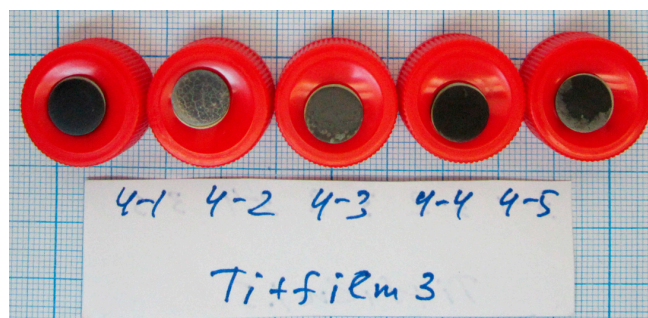

**Figure S1.** Ti-6Al-4V substrate surface after five-week *in vitro* immersion in 0.9% NaCl solution: A – uncoated, B – 0.5 µm, C – 1.5 µm, D – 3 µm film thickness.

**Table S1.** Na<sup>+</sup> concentrations (mmol) in 0.9% NaCl solution during five-week in vitro contact with test substrates, *Me(Q1; Q3)*, *n*<sub>1</sub>=15.

| Group number | Substrates                                       | Na <sup>+</sup> concentration in solution, mmol |                         |                                                         |                                         |                            |
|--------------|--------------------------------------------------|-------------------------------------------------|-------------------------|---------------------------------------------------------|-----------------------------------------|----------------------------|
|              |                                                  | After 1 week                                    | After 2 weeks           | After 3 weeks                                           | After 4 weeks                           | After 5 weeks              |
| 1            | 0.9 % NaCl reference solution                    | 155.1<br>(136.5; 158.2)                         | 155.8<br>(154.5; 156.4) | 155.1<br>(153.7; 156.0)                                 | 156.5<br>(155.5; 157.3)                 | 156.1<br>(154.6; 157.1)    |
| 2            | Uncoated Ti-6Al-4V                               | 157.7<br>(156.5; 157.9)                         | 157.4<br>(156.7; 158.2) | 156.2<br>(155.2; 156.6)                                 | 157.1<br>(122.8; 157.5)                 | 158.6<br>(158.0; 159.5)    |
| 3            | a-C:H:SiO <sub>x</sub> -coated 0.5-μm thick film | 153.9<br>(94.9; 157.5)                          | 157.4<br>(157.3; 157.9) | 158.2*<br><i>P</i> <sub>U1</sub> <0.05                  | 158.2<br><i>P</i> <sub>U1</sub> <0.05   | 155.1***<br>(111.5; 158.6) |
| 4            | a-C:H:SiO <sub>x</sub> -coated 1.5-μm thick film | 158.2<br>(157.3; 159.5)                         | 156.9<br>(156.9; 158.3) | 158.7<br>(158.4; 159.1)                                 | 158.0<br><i>P</i> <sub>U1,2</sub> <0.05 | 157.7<br>(157.4; 158.0)    |
| 5            | a-C:H:SiO <sub>x</sub> -coated 3-μm thick film   | 158.6<br>(158.5; 159.4)                         | 156.5<br>(154.8; 156.8) | 157.1<br>(156.9; 157.9)<br><i>P</i> <sub>U1</sub> <0.05 | 157.9<br>(157.3; 158.4)                 | 158.9<br>(158.5; 158.9)    |

**Table S2.** Cl<sup>-</sup> concentrations (mmol) in 0.9% NaCl solution during five-week in vitro contact with test substrates, *Me(Q1; Q3)*, *n*<sub>1</sub>=15.

| Group number | Substrates                                       | Cl <sup>-</sup> concentration in solution, mmol           |                          |                                                           |                           |                           |
|--------------|--------------------------------------------------|-----------------------------------------------------------|--------------------------|-----------------------------------------------------------|---------------------------|---------------------------|
|              |                                                  | After 1 week                                              | After 2 weeks            | After 3 weeks                                             | After 4 weeks             | After 5 weeks             |
| 1            | 0.9 % NaCl reference solution                    | 129.1<br>(114.2; 133.3)                                   | 129.8<br>(129.4; 130.1)  | 129.3<br>(129.0; 130.8)                                   | 130.7<br>(130.6; 131.0)   | 131.1<br>(130.2; 131.5)   |
| 2            | Uncoated Ti-6Al-4V                               | 132.6<br>(131.0; 132.6)                                   | 131.2<br>(131.0; 132.2)  | 131.1<br>(130.3; 131.2)                                   | 131.3<br>(130.5; 131.5)   | 132.2<br>(132.1; 132.3)   |
| 3            | a-C:H:SiO <sub>x</sub> -coated 0.5-μm thick film | 131.1<br>(128.2; 131.5)                                   | 131.4<br>(131.0; 131.6)  | 131.7<br>(131.1; 132.1)<br><i>P</i> <sub>U1</sub> <0.05   | 131.5<br>(131.1; 132.0)   | 129.5<br>(89.4; 132.3)    |
| 4            | a-C:H:SiO <sub>x</sub> -coated 1.5-μm thick film | 132.3<br>(132.1; 133.4)<br><i>P</i> <sub>U1,3</sub> <0.05 | 130.9*<br>(130.8; 131.7) | 132.4<br>(132.4; 133.2)                                   | 132.1**<br>(131.4; 133.2) | 132.5<br>(131.9; 132.5)   |
| 5            | a-C:H:SiO <sub>x</sub> -coated 3-μm thick film   | 132.8<br>(132.6; 133.1)<br><i>P</i> <sub>U3</sub> <0.05   | 130.9<br>(130.7; 130.9)  | 131.6**<br>(131.0; 132.1)<br><i>P</i> <sub>U1</sub> <0.05 | 131.5**<br>(131.3; 132.0) | 132.3**<br>(132.1; 132.5) |

*Note:* here and in Table S1 *n*<sub>1</sub> is the number of measurements in each group. Significant differences were determined: *P*<sub>U1</sub>-*P*<sub>U4</sub> < 0.05 vs. the corresponding group number with the Mann-Whitney U test; *P*<sub>T</sub> < 0.05 vs. 1st week (\*), 2nd week (\*\*), and 3d week (\*\*\*) with the Wilcoxon signed-rank test.
